# Supplementary material
Source: publisher site journal article supplement (https://www.degruyter.com/publication/journal_key/JBNST/downloadAsset/JBNST_Instructions%20for%20Authors.pdf)
Supplement: Supplementary file 1 [file JBNST_Instructions%20for%20Authors.pdf]

# Jahrbücher für Nationalökonomie und Statistik/ Journal of Economics and Statistics

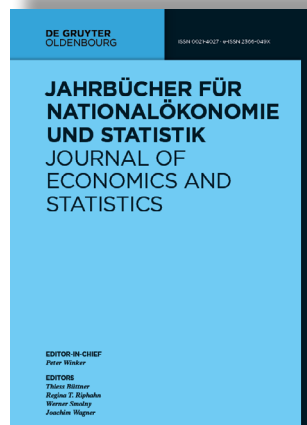

## Table of Contents

|                                                                  |          |
|------------------------------------------------------------------|----------|
| <b>Scope and general policies of the journal</b> .....           | <b>2</b> |
| Scope.....                                                       | 2        |
| Article (manuscript) categories.....                             | 2        |
| <b>Peer review, turnaround times and preprint policies</b> ..... | <b>2</b> |
| Peer review information.....                                     | 2        |
| Turnaround time.....                                             | 2        |
| Issue based publication.....                                     | 2        |
| Rejection of manuscripts.....                                    | 2        |
| Appeals.....                                                     | 3        |
| Preprint policy.....                                             | 3        |
| Inclusive language policy.....                                   | 3        |
| <b>Submission of manuscripts</b> .....                           | <b>3</b> |
| ORCID.....                                                       | 3        |
| Submission declaration and verification.....                     | 4        |
| Scientific misconduct.....                                       | 4        |
| Research integrity.....                                          | 4        |
| <b>Post-acceptance</b> .....                                     | <b>4</b> |
| Galley proofs.....                                               | 4        |
| Offprints.....                                                   | 4        |
| Repository policy.....                                           | 5        |
| Subscription-based and hybrid journals.....                      | 5        |
| Copyright.....                                                   | 5        |
| Open access journals.....                                        | 5        |
| License to Publish.....                                          | 5        |
| Open Access and Research Gate.....                               | 5        |
| Article Processing Charges (APCs).....                           | 5        |
| <b>Ethical conduct of research</b> .....                         | <b>5</b> |
| Acknowledgments.....                                             | 6        |
| Research funding.....                                            | 6        |
| Data availability.....                                           | 6        |
| <b>Preparation of manuscript</b> .....                           | <b>6</b> |
| Title page information.....                                      | 6        |
| Classification codes.....                                        | 7        |
| Language.....                                                    | 7        |
| General format and manuscript elements.....                      | 7        |
| Abstract.....                                                    | 7        |
| Keywords.....                                                    | 7        |
| Headings.....                                                    | 7        |
| References.....                                                  | 8        |
| Figures and figure captions.....                                 | 8        |
| Tables and table captions.....                                   | 8        |
| Abbreviations.....                                               | 8        |
| Equations and symbols.....                                       | 8        |
| Units.....                                                       | 9        |
| Audio and Video.....                                             | 9        |
| Appendices.....                                                  | 9        |
| Supplementary material.....                                      | 9        |

## Scope and general policies of the journal

### Scope

The *Journal of Economics and Statistics (Jahrbücher für Nationalökonomie und Statistik)* is a scientific journal published in Germany since 1863, since 2016 by De Gruyter Oldenbourg. Please find additional information as well as all volumes, issues and abstracts on the publishers' page of the Journal of Economics and Statistics.

The *Journal of Economics and Statistics* publishes papers in all fields of economics and applied statistics. A specific focus is on papers combining theory with empirical analyses.

Papers providing conclusions for economic policy in Europe are particularly welcome. Nevertheless, distinguished papers dealing exclusively with economic theory, empirical models, or economic history, will not be excluded from consideration.

The editors invite replication studies focusing on the robustness of empirical findings.

The section Data Observer presents articles on data sets available for empirical research and institutions providing research data. The journal also publishes special issues, short comments, and book reviews.

- scientists (academics), economic policy-makers, economics journalists
- 6 issues per year, print and online, English

### Article (manuscript) categories

- Original Article
- Special Issue Article
- Literature Review
- Under Debate
- Data Observer
- Book Review
- Editorial

## Peer review, turnaround times and preprint policies

### Peer review information

*JBNST* is a single-blind journal. Manuscripts are reviewed anonymously by at least two independent reviewers selected by the Editors.

The editors reserve the right to reject submitted manuscripts without peer review if the studies are not novel or important enough to merit publication in the journal. Manuscripts deemed unsuitable (insufficient originality or limited interest to the target audience) will be also rejected without review.

### Turnaround time

*JBNST* aspires to inform authors of the peer review decision within 12 weeks from submission date. Revised manuscripts should be returned within 12 weeks (minor revisions) and 24 weeks (major revisions). Accepted articles will be published online within 2–4 weeks of acceptance.

### Issue based publication

Articles are first published online as DOI citable articles and are later assigned to an issue with final page numbers.

### Rejection of manuscripts

Manuscripts dealing with subjects that have been well studied in the literature, and that do not resolve questions raised by previous studies, or manuscripts that are statistically underpowered, are likely to be rejected without peer review.

## Appeals

Manuscripts that have been rejected for publication will be reconsidered only at the discretion of the Editor(s). Authors wishing to request reconsideration of a previously rejected manuscript must do so in written form and submit a rebuttal by e-mail to the journal's editorial office. Authors should provide detailed reasons why they believe the manuscript should be reconsidered. If the rebuttal is accepted, the author will be asked to re-submit the manuscript, or the decision will be reversed.

## Preprint policy

De Gruyter does not consider the following purposes of a paper as pre-publication: publication in the form of a congress abstract, publication as an academic thesis, publication as an electronic preprint on recognized servers such as arXiv, RePEc, bioRxiv, ResearchSquare, etc.

## Inclusive language policy

Inclusive language recognizes diversity, conveys respect for all people, is sensitive to differences and promotes equal opportunities. Content should not make assumptions about readers' beliefs or commitments; should not contain anything that might suggest that one person is superior to another because of age, gender, race, ethnicity, culture, sexual orientation, disability or health condition; and should use inclusive language throughout. Authors should ensure that their writing is free from prejudice, stereotypes, slang, references to the dominant culture and/or cultural assumptions.

We advise the following approach: Aim for gender neutrality by using plural nouns (clinicians, clients, participants) as standard and avoiding "he" or "she", wherever possible. Instead, please use "they". We recommend avoiding the use of descriptors that refer to personal characteristics such as age, gender, race, ethnicity, culture, sexual orientation, disability or health status unless they are relevant and valid.

## Submission of manuscripts

- Submit manuscripts exclusively online at: <https://mc.manuscriptcentral.com/jbnst>

We strongly recommend the authors register with institutional e-mail addresses, and refrain from using private e-mail addresses. A cover letter must be submitted for each manuscript upon first submission. It should contain a brief statement by the authors as to the element of novelty upon which they base their request for publication in *JBNST*. Please address the cover letter to the Editor-in-Chief. Revised manuscripts must be accompanied by a point-by-point reply to the reviewers' criticisms. Major changes in the revised manuscript must be highlighted, preferably in tracked changes mode. A second, clean version should always be submitted for major changes.

- Book reviews

The *Journal of Economics and Statistics* also publishes book reviews. The editors invite authors for the review of selected books. The length of book reviews is typically between 0,5 and 3 manuscript pages. Book reviews can be submitted on <https://mc.manuscriptcentral.com/jbnst>. They should include the following information:

- The heading should include the title of the book, the publisher, year of publication, number of pages, price, and ISBN (including the dashes)
- The reviewers' affiliation

## ORCID

The ORCID (Open Researcher and Contributor ID) is a non-profit, publisher-independent system that is used to uniquely identify academics and their publications. Click [here](#) for detailed information about ORCID. Submitting authors can login with username and password. If the journal uses ScholarOne as submission tool, authors can also login with their ORCID number. Providing an ORCID number for each author is strongly recommended. ORCID numbers should be listed on the title page.

### Submission declaration and verification

For information on plagiarism, please refer to [COPE – Committee of Publication Ethics](#). Submission of a manuscript to a journal implies that the work described has not been published previously, except in the form of an abstract, academic thesis, lecture, or preprint; that it is not under consideration for publication elsewhere (multiple, redundant, concurrent publication); that publication of the work is approved by all authors and tacitly or explicitly by the responsible authorities where the work was carried out; if accepted for publication, the manuscript will be published under the Creative Commons License CC-BY 4.0 (Share – copy and redistribute the material in any medium or format. Adapt – remix, transform, and build upon the material for any purpose, even commercially). Exceptions are listed under Preprint policy.

To exclude potential overlap with prior publication(s), your manuscript may be checked by the plagiarism checker Crossref Similarity Check ([iThenticate](#)). Previously published material must be referenced appropriately in the manuscript, regardless of whether the material was previously published in a subscription based, hybrid or open access journal, or in another language.

### Scientific misconduct

Only articles that have not been or will not be published elsewhere will be published in the journal, excluding articles that fall under De Gruyter's [Repository Policy](#). Multiple submissions/publications or redundant publications (i.e., republication of data already published by the same authors) will be rejected. If identified after publication, the journal reserves the right to publish a retraction note. In any case, editors will follow COPE's Code of Conduct and implement its advice.

### Research integrity

The authors are responsible for all aspects of the study and will ensure that any questions regarding the accuracy and integrity of any part of the work are adequately investigated and resolved.

With submitting your manuscript to *JBNST* the authors declare that they are the sole and intellectual authors of the manuscript. We do not accept submissions that name Artificial Intelligence (AI) and/or Machine Learning Tools as credited author(s) on a manuscript because such tools cannot take responsibility for the submitted work and therefore cannot be considered as eligible authors. Where such tools or technologies are used as part of the design or methodology of a research study, their use should be clearly described in the Acknowledgments section.

## Post-acceptance

### Galley proofs

*Online proofreading:* The corresponding author of an article receives the galley proofs in electronic form to check them for editing and typesetting accuracy. Corresponding authors receive an e-mail notification ("Check your proof") with a link to the online proofreading system (Proof Central) through which they can access their galley proofs. The interface is similar to MS Word: authors can edit the text by entering their corrections directly, adding comments, and answering questions from the copy editor. If preferred, authors can also annotate and upload edits to the PDF version.

All instructions for proof corrections, including deadlines, will be given in the e-mail notification to the corresponding author, along with a user guide, providing step-by-step instructions for inserting corrections.

Substantial changes to an article accepted for publication will only be considered with the permission of the Editor or after additional peer review. The responsibility for proofreading lies solely with the authors. **According to De Gruyter policy, once an article has been accepted, no changes to the author list and article title are allowed (except typos). The De Gruyter production team is instructed to enforce this policy during the production/proof correction process.**

### Offprints

Electronic files of typeset articles in Adobe Acrobat PDF format are provided free of charge. The corresponding author will receive an e-mail notification when the article has been published online along with instructions on how to access the article.

## Repository policy

Policies for sharing published journal articles differ for subscription-based and open access articles.

### Subscription-based and hybrid journals

Authors may publish their articles in a public repository after an embargo period of 12 months (see De Gruyter's [Sharing Policy](#)). Only the accepted author version of the manuscript, not the PDF version of the published article, can be published:

Immediately

- via their non-commercial personal website, blog or social media channels
- by updating a preprint in arXiv, RePEc, bioRxiv, ResearchSquare, etc. with the version of the accepted manuscript
- as a closed deposit via their research institute or institutional repository for internal institutional purposes or as part of an invitation-only research collaboration workgroup
- directly by providing copies to their students or to research collaborators for their personal use
- for private scholarly sharing as part of an invitation-only work group

After an embargo period

- as open deposits to institutional or subject repositories
- to scholarly collaboration networks (SCNs)

## Copyright

Manuscripts submitted to subscription and hybrid journals are accepted on condition of transfer of copyright ([License to Publish](#)) (for U.S. government employees: to the extent transferable) to the publisher. Once the manuscript has been accepted, it may not be published elsewhere without the consent of the copyright holders.

### Open access journals

All De Gruyter open access publications are published under a [Creative Commons license](#). The Creative Commons licenses specify the extent to which the work can be re-used by the scholarly community and the general public. For us as publisher, this means that we receive non-exclusive exploitation rights.

Permitted third party reuse of gold open access articles is determined by the user license. The majority of all De Gruyter journals are published under the Creative Commons license CC-BY 4.0 (<http://creativecommons.org/licenses/by/4.0>), but there are exceptions. The Creative Commons license is specified in the 'License to Publish', which you can download from the journal's website.

### License to Publish

During submission of an article to an Open Access journal, authors will be asked to complete a '[License to Publish](#)'.

### Open Access and Research Gate

Authors publishing Open Access will see their articles automatically added to their publication pages on [Research Gate](#).

## Article Processing Charges (APCs)

Starting 2023, the Journal of Economics and Statistics will be transferred to Diamond Open Access on a year-by-year basis. All articles will thus immediately appear under the Creative Commons license CC-BY.

There will be no publication costs for the authors.

The Open Access transformation is based on Subscribe-to-Open, an alternative model that enables the full Open Access transformation of journals through the continuation of existing subscriptions. The prerequisite for successful transformation is that subscriptions are continued to the same extent as before.

## Ethical conduct of research

**Manuscripts must follow certain ethical guidelines** to be considered for publication. These can generally be found in the [Publication Ethics and Malpractice Statement](#). Accordingly, **before submitting your manuscript, please make sure that you and your co-authors agree to the applicable requirements**. For example, this may involve declaring and ruling out conflicts of interest or proving compliance with legal requirements related to human and animal testing.

Furthermore, our [Code of Conduct for Publication Procedures and Ethics](#) defines the responsibility of De Gruyter

as a publisher and the Editors we work with, to ensure the legitimacy and quality of our published research. Our principles are based on the guidelines of the [Committee on Publication Ethics \(COPE\)](#).

### Acknowledgments

Authors may wish to acknowledge individuals, working groups, institutions, etc. who provided help and support (other than financial) during research and the preparation of the manuscript (e.g., language checking, writing assistance or proof reading of the article, etc.). Individuals acknowledged are not included on the title page, as a footnote to the title or otherwise.

We do not accept submissions that name Artificial Intelligence (AI) and/or Machine Learning Tools as credited author(s) on a manuscript because such tools cannot take responsibility for the submitted work and therefore cannot be considered as eligible authors. Where such tools or technologies are used as part of the design or methodology of a research study, their use should be clearly described in the Acknowledgments section.

### Research funding

Funding sources should be listed at the end of the manuscript, before the References. When the study benefitted from funding through an unrestricted grant or other resources provided to a university, college, other research institution, or an individual author, state the name of the institute or organization that provided the funding along with the grant number, if applicable.

If no funding was provided for the research, the default statement will be set in place: *None declared*.

### Data availability

*JBNST* requires authors to follow our [Data Sharing Policy](#), which must comply with the European GDPR (*General Data Protection Regulation*) rules. Research data should be made widely available to the research community to demonstrate the robustness and validity of the research presented in the journal, to enable and encourage replication of the results, and to allow the community with opportunities to learn.

By publishing in the journal, authors are required to provide a data availability statement (DAS) in their articles. The DAS confirms the presence or absence of shared data. The DAS should include information on where the data supporting the findings reported in the article can be found, including, if applicable, hyperlinks to publicly archived datasets analyzed or generated during the study. If research data are not publicly available, this must be stated in the manuscript, as well as the conditions for accessing the data.

Authors are encouraged to share their data but are not required to do so. The decision to publish will not be affected by whether or not authors share their research data.

The DAS should be included either before the References or in the “[Template for Ethical and Legal Declarations](#)”, which is required for submission.

*Data Archive*: The Journal of Economics and Statistics (*Jahrbücher für Nationalökonomie und Statistik*) maintains a Data Archive in cooperation with ZBW (<https://journaldata.zbw.eu/journals/jbnst>). Authors of accepted papers are expected to deposit a complete set of all data used for their analysis in electronic form. Further details will be provided after acceptance of the paper.

## Preparation of manuscript

### Title page information

Please provide the following information on the first page of your manuscript during the submission process:

- Author names

Write at least one given and family name in full. For all other names, initial is sufficient. List authors in the order you want them to appear in the final version. Indicate the corresponding author by using an asterisk “\*” after the family name. Please note that as per De Gruyter policy, no author list changes are permitted after acceptance of a manuscript.

Author footnotes (superscript letters or numbers) to explain authorship details are not all allowed in the author line and will be converted to an author note on the first page. Kindly stick to the wording as in the examples below:

- [Full name author A] and [full name author B] contributed equally to this work.

- [Full name author A] and [full name author B] contributed equally to this work and share first authorship.
- [Full name author A] and [full name author B] share senior authorship.
- [Full name author A] and [full name author B] share first authorship.

De Gruyter does not allow the use of the Author Randomization Tool of the American Economic Association.

- Title and short title

Provide a descriptive, concise and comprehensible main title as well as an abbreviated form of the main title (running head) with no more than 40 (small format) characters (including blanks). The short title will be displayed on the top of each page of the final version.

The article title and subtitle should be in title case. Use uppercase letters after colon.

- Affiliations

For the corresponding author supply the following details: e-mail address, department, institution, street, city, postal code and country; for all other authors department, institution, city, postal code and country are mandatory. Please also provide all details concerning the current institutional affiliation in case you changed affiliation during the manuscript preparation and publication process.

Supplying an ORCID is highly recommended (for more information and registration, please visit the ORCID webpage: <https://info.orcid.org/benefits-for-researchers/>)

- Please also indicate the word count, number of tables and figures, and whether your manuscript contains supplementary material.

### Classification codes

To classify your article, the journal uses JEL Codes according to <https://www.aeaweb.org/econlit/jelCodes.php?view=jel>. This will be queried during the submission process in ScholarOne Manuscripts

### Language

All manuscripts must be written in clear and concise English. Please use British or American English consistently. De Gruyter does provide a *light* copyedit of manuscripts, but authors remain responsible for being their own copyeditors. If you have reasons to doubt your proficiency with respect to spelling, grammar, etc. (e.g., because English is not your native language), then you may wish to employ – at your expense – the services of a professional language editor.

### General format and manuscript elements

#### Abstract

Give a concise summary of your article in an abstract of approx. 250 words in a single paragraph. As abstracts are published separately by abstracting and indexing services, please spell out abbreviations at first use and do not include footnotes, tables, figures or equations. Avoid using references. If it is essential to use a reference in the abstract, please expand it as per journal reference style.

#### Keywords

Keywords are used by abstracting and indexing services as well as search engines to facilitate finding your paper. Together with the abstract of your paper, they are a key tool enabling readers to find your paper and for increasing citations.

Supply 3–6 specific keywords in alphabetical order and lower case, separated by comma.

These can be single words, but also short phrases representing the content. Make sure to select precise and concise keywords to your field or sub-field of research. Avoid abbreviations and the repetition of words already used in the article's title.

#### Headings

Your manuscript should be subdivided into sections (and, if necessary, subsections). These sections should be labeled with headings in a consistent format and with a clear hierarchy of section headings. Limit your subsections to a maximum of four levels. For subdivided sections ensure that they have at least two subheadings on one level. Headings do not have an end period.

Headings should be numbered and in title case. Use uppercase letters after colon, even for articles.

### References

Please adhere strictly to the reference style of *JBNST* as outlined in the [CMS author date Reference Style Sheet](#). The style sheet provides examples for different types of citations in the text as well as for different bibliographic items in the reference list. Please note: All references mentioned in the reference list must be mentioned in the text, and vice versa.

### Figures and figure captions

Graphs, line drawings, photographs, schemes, diagrams, etc. may be used to illustrate your findings. Publication of color figures is provided free of charge in both online and print editions. The publication quality always depends directly on the quality and size of the delivered data.

Please label the illustrations as “Figure”. Each figure should be uploaded separately as .jpg, .eps, .png or .tiff file. Images should have a minimum resolution of 300 dpi (color or black-white pixel graphics/half-tone images) in the intended size (600dpi combination of pixel graphic and line drawing, 1200dpi for line drawings). When drawing bar graphs, use patterning/color instead of grey scales (faint shading may be lost upon reproduction). Figures should not display any frames.

Figures should be numbered consecutively using Arabic numerals (from 1) throughout the text. If you include multi-part figures, please make sure to label all part figures by using lowercase letters. Please make sure that all figures are explicitly referred to in the text. Do not end the text immediately preceding the suggested positioning of a figure with a colon and avoid expressions such as “in Figure 1 below/above”, as the exact positioning of these elements cannot be determined until after the manuscript has been typeset. Note that figures will usually be placed on the top or the bottom of the page in the final layout.

Provide a concise and self-explanatory caption for each figure. In case of multi-part figures, please include a main caption as well as part figure captions.

The key to the symbols depicted in the figures should be included in the figure itself, where possible. Otherwise, include it in the caption. The caption itself should not be included in the figure.

Please make sure that letters, numbers, symbols, text, etc. included in the figure are clear, easy to read (not below 6pt, preferably in Arial or Helvetica) and uniform in style.

It is the authors' responsibility to use images that do not infringe on any copyrights, performing rights, trademark rights, personal rights or any other third-party rights or are otherwise unlawful. Copyright permissions can be obtained through the Copyright Clearance Center (<https://www.copyright.com/>).

### Tables and table captions

Number tables consecutively using Arabic numerals. Tables should be provided in an editable source format (Word, LaTeX). Please avoid handing in tables as image or Excel files.

Provide a short descriptive title, column heads, and (if necessary) footnotes to make each table self-explanatory. In column heads, separate units with a comma and use parentheses or square brackets for additional measures (e.g., %, range, etc.). Use footnotes in alphabetical order (a, b, c, etc.) to give emphasis or further information. Expand abbreviations used in tables in footnotes.

In case bold type or italics are used to highlight information, please explain their meaning.

Avoid color, shading, vertical lines, and other cell borders. Note that most horizontal lines within the table body will be removed during the production process.

Indicate where to place the table approximately (e.g., [Place Table 1 near here]). Do not end the text immediately preceding the suggested positioning of a table with a colon and avoid expressions such as “in Table 1 below/above”, as the exact positioning of these elements cannot be determined until after the manuscript has been typeset. Note that tables will usually be placed on the top or the bottom of the page in the final layout.

### Abbreviations

The use of abbreviations and acronyms is permitted given that they are expanded in full when used the first time with the abbreviation in parentheses (applies to abstract and main text). Please use them consistently thereafter. Avoid using non-standard abbreviations unless they appear more than three times in the text. We recommend providing a list with an overview of all abbreviations.

### Equations and symbols

Equations should be well-aligned and not crowded. Use only Latin and Greek alphabets. Avoid complicated superscripts and subscripts by introducing new symbols. Avoid repetition of a complicated expression by representing it with a symbol. For MS Word submissions create equations using the Microsoft equation editor or a correspond-



ing add-on. Do not submit math equations as images, but as editable text. Number displayed equations consecutively with Arabic numerals (if referred to in the text).

### **Units**

Use SI units. For more information, please visit <https://www.bipm.org/en/home>

### **Audio and Video**

For all examples connected to an audio/video recording, supply audio/video clips. Deliver these clips as separate files and do not integrate them directly into the manuscript.

Name all your clips using the following convention:

e.g., audio-1-smith.MP3, video-1-smith.MP4,

[media]-[identifier]-[author-family-name].[extension]

Indicate the position in the article by placing a marker as follows:

[associated audio-1-smith.wav with example (1)]

Provide a short caption for each media file and number them consecutively. Any other media files can be included as part of the supplementary material.

File naming: audiosupplement-1-smith.MP3,

[media.supplement]-[identifier]-[author-family-name].[extension]

The following formats are preferred: audio files in MP3 (at least 16 bit) and video files in MP4 (at least a height of 480 pixels and a frame rate of 25). However, other common formats are also permitted.

### **Appendices**

Use appendices for information that supports your findings but is not essential for the understanding of your paper (e.g., lengthy mathematical proofs, tables, graphics, etc.). Cite appendices within the main text. Tables and figures in the appendix should be numbered consecutively as follows: Figure A.1, Table A.1, Figure A.2, Table A.2, etc. The appendix is placed at the end of the main text before the reference list.

### **Supplementary material**

Supplementary material which may offer further information on your work but does not belong to the core part of the article, will not be part of the typeset article PDF. The material will be made available as a separate download in the online version of the article. Supplementary material may contain questionnaires for discussed surveys, protocols, code samples, datasets, extensive tables, additional figures, multimedia files (audio, video, animations), etc. If the manuscript is accepted, supplementary material will be referenced in the print version, but will be published online only.

Please provide supplementary material data as separate file(s) of no more than 10 MB per file during submission. Note that the material should be publication-ready (not in track-changes mode), as it will not be typeset, but published exactly as supplied. Within the text, the supplementary material must be cited consecutively and be referred to as supplementary material data (e.g., see Supplementary Material, Fig. 1, or Figure S1, Table S1, etc.).

### **Please contact for any further questions:**

Name: Carmen Hersener

Tel.: 0641/9922641

Email: [jahrbuecher@wirtschaft.uni-giessen.de](mailto:jahrbuecher@wirtschaft.uni-giessen.de)
